# Supplementary material for: Trichomonas vaginalis Detection in Urogenital Specimens from Symptomatic and Asymptomatic Men and Women by Use of the cobas TV/MG Test
Source: PubMed Central journal article supplement (PMC8451429; doi:10.1128/jcm.00264-21), 2021-09-20
Supplement: jcm.00264-21-s0001.pdf [file jcm.00264-21-s0001.pdf]

Supplementary Table 1. Numbers of patients enrolled by clinic, gender, and *T. vaginalis* positivity.

| Clinic (by State of location) | Men            |                                        | Women          |                                        |
|-------------------------------|----------------|----------------------------------------|----------------|----------------------------------------|
|                               | Total enrolled | Total positive for <i>T. vaginalis</i> | Total enrolled | Total positive for <i>T. vaginalis</i> |
| Alabama                       | 72             | 1 (1.4%)                               | 1126           | 147 (13.1%)                            |
| California                    | 300            | 13 (4.3%)                              | 597            | 159 (26.6%)                            |
| Connecticut                   | 392            | 2 (0.5%)                               | 593            | 37 (6.2%)                              |
| Florida (site 1)              | 300            | 13 (4.3%)                              | 600            | 156 (26.2%)                            |
| Florida (site 2)              | 285            | 4 (1.4%)                               | 575            | 136 (23.7%)                            |
| Indiana                       | 74             | 2 (2.7%)                               | 47             | 5 (10.6%)                              |
| Louisiana                     | 387            | 5 (1.3%)                               | 340            | 52 (15.3%)                             |
| Missouri                      | 82             | –                                      | 591            | 47 (8.0%)                              |
| Mississippi                   | 96             | 1 (1.0%)                               | –              | –                                      |
| Rhode Island                  | 142            | –                                      | –              | –                                      |

Data shown are cobas positive results, regardless of the PIS.

Supplementary Table 2. Clinical performance compared with PIS by gender, sample type, and clinic.

| Sample type <sup>a</sup>                          | State            | Total (N) | Sensitivity % (N/N) | 95% score CI  | Specificity % (N/N) | 95% score CI  | Prevalence (%) | PPV (%) | NPV (%) |
|---------------------------------------------------|------------------|-----------|---------------------|---------------|---------------------|---------------|----------------|---------|---------|
| Female                                            |                  |           |                     |               |                     |               |                |         |         |
| Urine                                             | Alabama          | 274       | 100.0 (35/35)       | (90.1, 100.0) | 99.2 (237/239)      | (97.0, 99.8)  | 12.8           | 94.6    | 100.0   |
|                                                   | California       | 135       | 94.6 (35/37)        | (82.3, 98.5)  | 96.9 (95/98)        | (91.4, 99.0)  | 27.4           | 92.1    | 97.9    |
|                                                   | Connecticut      | 149       | 100.0 (9/9)         | (70.1, 100.0) | 99.3 (139/140)      | (96.1, 99.9)  | 6.0            | 90.0    | 100.0   |
|                                                   | Florida          | 149       | 97.4 (37/38)        | (86.5, 99.5)  | 96.4 (107/111)      | (91.1, 98.6)  | 25.5           | 90.2    | 99.1    |
|                                                   | Florida (site 2) | 133       | 100.0 (29/29)       | (88.3, 100.0) | 99.0 (103/104)      | (94.8, 99.8)  | 21.8           | 96.7    | 100.0   |
|                                                   | Indianapolis     | 10        | 100.0 (1/1)         | (20.7, 100.0) | 100.0 (9/9)         | (70.1, 100.0) | 10.0           | 100.0   | 100.0   |
|                                                   | Louisiana        | 83        | 100.0 (12/12)       | (75.8, 100.0) | 98.6 (70/71)        | (92.4, 99.8)  | 14.5           | 92.3    | 100.0   |
|                                                   | Missouri         | 144       | 90.0 (9/10)         | (59.6, 98.2)  | 100.0 (134/134)     | (97.2, 100.0) | 6.9            | 100.0   | 99.3    |
|                                                   | Overall          | 1077      | 97.7 (167/171)      | (94.1, 99.1)  | 98.7 (894/906)      | (97.7, 99.2)  | 15.9           | 93.3    | 99.6    |
| Vaginal swab (both clinician- and self-collected) | Alabama          | 276       | 100.0 (35/35)       | (90.1, 100.0) | 98.8 (238/241)      | (96.4, 99.6)  | 12.7           | 92.1    | 100.0   |
|                                                   | California       | 135       | 97.3 (36/37)        | (86.2, 99.5)  | 92.9 (91/98)        | (86.0, 96.5)  | 27.4           | 83.7    | 98.9    |
|                                                   | Connecticut      | 148       | 100.0 (9/9)         | (70.1, 100.0) | 98.6 (137/139)      | (94.9, 99.6)  | 6.1            | 81.8    | 100.0   |
|                                                   | Florida          | 149       | 100.0 (38/38)       | (90.8, 100.0) | 96.4 (107/111)      | (91.1, 98.6)  | 25.5           | 90.5    | 100.0   |
|                                                   | Florida (site 2) | 132       | 100.0 (29/29)       | (88.3, 100.0) | 92.2 (95/103)       | (85.4, 96.0)  | 22.0           | 78.4    | 100.0   |
|                                                   | Indianapolis     | 11        | 100.0 (1/1)         | (20.7, 100.0) | 100.0 (10/10)       | (72.2, 100.0) | 9.1            | 100.0   | 100.0   |
|                                                   | Louisiana        | 83        | 100.0 (12/12)       | (75.8, 100.0) | 97.2 (69/71)        | (90.3, 99.2)  | 14.5           | 85.7    | 100.0   |
|                                                   | Missouri         | 143       | 100.0 (10/10)       | (72.2, 100.0) | 97.7 (130/133)      | (93.6, 99.2)  | 7.0            | 76.9    | 100.0   |
|                                                   | Overall          | 1077      | 99.4 (170/171)      | (96.8, 99.9)  | 96.8 (877/906)      | (95.4, 97.8)  | 15.9           | 85.4    | 99.9    |
| PreservCyt samples                                | Alabama          | 275       | 94.3 (33/35)        | (81.4, 98.4)  | 98.8 (237/240)      | (96.4, 99.6)  | 12.7           | 91.7    | 99.2    |
|                                                   | California       | 135       | 97.3 (36/37)        | (86.2, 99.5)  | 99.0 (97/98)        | (94.4, 99.8)  | 27.4           | 97.3    | 99.0    |
|                                                   | Connecticut      | 147       | 88.9 (8/9)          | (56.5, 98.0)  | 100.0 (138/138)     | (97.3, 100.0) | 6.1            | 100.0   | 99.3    |

|                   |                  |      |                |               |                 |               |      |       |       |
|-------------------|------------------|------|----------------|---------------|-----------------|---------------|------|-------|-------|
|                   | Florida          | 148  | 91.9 (34/37)   | (78.7, 97.2)  | 99.1 (110/111)  | (95.1, 99.8)  | 25.0 | 97.1  | 97.3  |
|                   | Florida (site 2) | 133  | 100.0 (29/29)  | (88.3, 100.0) | 99.0 (103/104)  | (94.8, 99.8)  | 21.8 | 96.7  | 100.0 |
|                   | Indianapolis     | 11   | 100.0 (1/1)    | (20.7, 100.0) | 100.0 (10/10)   | (72.2, 100.0) | 9.1  | 100.0 | 100.0 |
|                   | Louisiana        | 83   | 100.0 (12/12)  | (75.8, 100.0) | 100.0 (71/71)   | (94.9, 100.0) | 14.5 | 100.0 | 100.0 |
|                   | Missouri         | 142  | 80.0 (8/10)    | (49.0, 94.3)  | 97.0 (128/132)  | (92.5, 98.8)  | 7.0  | 66.7  | 98.5  |
|                   | Overall          | 1074 | 94.7 (161/170) | (90.2, 97.2)  | 98.9 (894/904)  | (98.0, 99.4)  | 15.8 | 94.2  | 99.0  |
| Endocervical swab | Alabama          | 274  | 100.0 (35/35)  | (90.1, 100.0) | 99.6 (238/239)  | (97.7, 99.9)  | 12.8 | 97.2  | 100.0 |
|                   | California       | 135  | 94.6 (35/37)   | (82.3, 98.5)  | 94.9 (93/98)    | (88.6, 97.8)  | 27.4 | 87.5  | 97.9  |
|                   | Connecticut      | 148  | 88.9 (8/9)     | (56.5, 98.0)  | 100.0 (139/139) | (97.3, 100.0) | 6.1  | 100.0 | 99.3  |
|                   | Florida          | 149  | 97.4 (37/38)   | (86.5, 99.5)  | 99.1 (110/111)  | (95.1, 99.8)  | 25.5 | 97.4  | 99.1  |
|                   | Florida (site 2) | 131  | 100.0 (28/28)  | (87.9, 100.0) | 95.1 (98/103)   | (89.1, 97.9)  | 21.4 | 84.8  | 100.0 |
|                   | Indianapolis     | 11   | 100.0 (1/1)    | (20.7, 100.0) | 90.0 (9/10)     | (59.6, 98.2)  | 9.1  | 50.0  | 100.0 |
|                   | Louisiana        | 83   | 100.0 (12/12)  | (75.8, 100.0) | 98.6 (70/71)    | (92.4, 99.8)  | 14.5 | 92.3  | 100.0 |
|                   | Missouri         | 143  | 100.0 (10/10)  | (72.2, 100.0) | 97.7 (130/133)  | (93.6, 99.2)  | 7.0  | 76.9  | 100.0 |
|                   | Overall          | 1074 | 97.6 (166/170) | (94.1, 99.1)  | 98.1 (887/904)  | (97.0, 98.8)  | 15.8 | 90.7  | 99.6  |
| Male              |                  |      |                |               |                 |               |      |       |       |
| Urine             | Alabama          | 34   | 100.0 (1/1)    | (20.7, 100.0) | 100.0 (33/33)   | (89.6, 100.0) | 2.9  | 100.0 | 100.0 |
|                   | California       | 120  | 100.0 (8/8)    | (67.6, 100.0) | 97.3 (109/112)  | (92.4, 99.1)  | 6.7  | 72.7  | 100.0 |
|                   | Connecticut      | 186  | 100.0 (1/1)    | (20.7, 100.0) | 99.5 (184/185)  | (97.0, 99.9)  | 0.5  | 50.0  | 100.0 |
|                   | Florida          | 138  | 100.0 (7/7)    | (64.6, 100.0) | 96.2 (126/131)  | (91.4, 98.4)  | 5.1  | 58.3  | 100.0 |
|                   | Florida (site 2) | 127  | 100.0 (2/2)    | (34.2, 100.0) | 98.4 (123/125)  | (94.4, 99.6)  | 1.6  | 50.0  | 100.0 |
|                   | Indianapolis     | 36   | -              | -             | 94.4 (34/36)    | (81.9, 98.5)  | 0.0  | 0.0   | 100.0 |
|                   | Louisiana        | 188  | 100.0 (3/3)    | (43.9, 100.0) | 98.9 (183/185)  | (96.1, 99.7)  | 1.6  | 60.0  | 100.0 |
|                   | Mississippi      | 44   | 100.0 (1/1)    | (20.7, 100.0) | 100.0 (43/43)   | (91.8, 100.0) | 2.3  | 100.0 | 100.0 |
|                   | Missouri         | 41   | -              | -             | 100.0 (41/41)   | (91.4, 100.0) | 0.0  | -     | 100.0 |
|                   | Rhode Island     | 69   | -              | -             | 100.0 (69/69)   | (94.7, 100.0) | 0.0  | -     | 100.0 |

|                                                  |                  |     |               |               |                |               |     |      |       |
|--------------------------------------------------|------------------|-----|---------------|---------------|----------------|---------------|-----|------|-------|
|                                                  | Overall          | 983 | 100.0 (23/23) | (85.7, 100.0) | 98.4 (945/960) | (97.4, 99.1)  | 2.3 | 60.5 | 100.0 |
| Meatal swab (both clinician- and self-collected) | Alabama          | 34  | 100.0 (1/1)   | (20.7, 100.0) | 97.0 (32/33)   | (84.7, 99.5)  | 2.9 | 50.0 | 100.0 |
|                                                  | California       | 120 | 100.0 (8/8)   | (67.6, 100.0) | 90.2 (101/112) | (83.3, 94.4)  | 6.7 | 42.1 | 100.0 |
|                                                  | Connecticut      | 183 | 100.0 (2/2)   | (34.2, 100.0) | 94.5 (171/181) | (90.1, 97.0)  | 1.1 | 16.7 | 100.0 |
|                                                  | Florida          | 138 | 100.0 (7/7)   | (64.6, 100.0) | 87.8 (115/131) | (81.1, 92.3)  | 5.1 | 30.4 | 100.0 |
|                                                  | Florida (site 2) | 125 | 100.0 (2/2)   | (34.2, 100.0) | 89.4 (110/123) | (82.8, 93.7)  | 1.6 | 13.3 | 100.0 |
|                                                  | Indiana          | 36  | -             | -             | 80.6 (29/36)   | (65.0, 90.2)  | 0.0 | 0.0  | 100.0 |
|                                                  | Louisiana        | 187 | 100.0 (3/3)   | (43.9, 100.0) | 94.0 (173/184) | (89.6, 96.6)  | 1.6 | 21.4 | 100.0 |
|                                                  | Mississippi      | 44  | 100.0 (1/1)   | (20.7, 100.0) | 97.7 (42/43)   | (87.9, 99.6)  | 2.3 | 50.0 | 100.0 |
|                                                  | Missouri         | 41  | -             | -             | 97.6 (40/41)   | (87.4, 99.6)  | 0.0 | 0.0  | 100.0 |
|                                                  | Rhode Island     | 69  | -             | -             | 100.0 (69/69)  | (94.7, 100.0) | 0.0 | -    | 100.0 |
|                                                  | Overall          | 977 | 100.0 (24/24) | (86.2, 100.0) | 92.5 (882/953) | (90.7, 94.1)  | 2.5 | 25.3 | 100.0 |

<sup>a</sup>Subjects with a designated patient infection status (Infected or Non-Infected) and a valid test result with cobas TV/MG for TV are considered evaluable and included in this summary table. Clinics UMC01 and TMH01 enrolled only male subjects.

CI, confidence interval; N, number of samples; NPV, negative predictive value, PPV = positive predictive value; PIS, patient infection status.

Supplementary Table 3. Ct values for male urine and meatal swab samples positive for *T. vaginalis* by the cobas TV/MG assay.

| Sample type<br>cobas/PIS result | N  | Ct values |      |         |                |        |                |         |
|---------------------------------|----|-----------|------|---------|----------------|--------|----------------|---------|
|                                 |    | Mean      | SD   | Minimum | Lower quartile | Median | Upper quartile | Maximum |
| MU<br>cobas+/PIS+               | 23 | 23.46     | 3.05 | 20.15   | 21.25          | 22.69  | 25.06          | 32.29   |
| MU<br>cobas+/PIS-               | 15 | 36.58     | 2.20 | 30.95   | 34.99          | 37.21  | 38.09          | 39.21   |
| MS<br>cobas+/PIS+               | 24 | 25.29     | 4.25 | 16.91   | 22.27          | 25.73  | 28.22          | 33.12   |
| MS<br>cobas+/PIS-               | 71 | 36.93     | 2.83 | 28.47   | 35.47          | 37.50  | 38.50          | 46.50   |

Ct, cycle threshold; MS, meatal swab; MU, male urine; N, number of samples; PIS, patient infection status; SD, standard deviation
